# Supplementary material for: 大胆探索 规范运作 科学管理 勇于创新——威海市粮油仓储管理工作回顾
Source: HighWire-hosted journal article supplement (doi:10.1101/gr.165035.113), 2002-01-01
Supplement: Supplemental_Legends.docx [file Supplemental_Legends.docx]

## Supplementary Table 1

GENCODE lincRNAs with conserved protein-coding potential. The top 70 lincRNAs sorted by RNAcode p-value are shown. Solid bullets indicate significant expression (p<0.1) of the putative ortholog in a species. Open circles indicate that more than 30% of the exonic portions of the human transcript could be aligned to the other species but no expression is detected. Brackets around bullets and circles mean that the mapping is not reciprocal, i.e. mapping back from the other species to human results in a different locus. This information is important, because the coding potential can be the result of pseudogenes or fragments of pseudogenes that cannot be uniquely mapped between species. Also the coding potential could be an artifact of a pseudogene aligned to the active gene in other species. The goal of the protein-coding potential analysis for the purpose of this paper was mainly to exclude ambiguous cases from the lincRNA set. A final assessment of whether those GENCODE transcripts are in fact *bona fide* protein-coding genes would require a more in-depth analysis. Species abbreviations: hg: human; panTro: chimpanzee; ponAbe: orangutan; rheMac: rhesus; bosTau: cow; mm: mouse; rn: rat monDom: opossum; ornAna:platypus; galGal: chicken. Note that we have added non-placental mammals from opossum, platypus and chicken libraries from (Merkin et al. 2012) for this analysis.

## Supplementary Table 2

Overview of the RNA-seq data sets used in this study (see Methods for details).

## Supplementary Table 3

Relative constraint, measured as a linear interpolation in derived allele frequency (DAF) measured in non-coding regions outside mammalian-conserved elements. The interpolation is between two reference points for conserved and non-conserved regions, respectively set to be all conserved non-coding elements (100% constraint) and all non-encode regions in non-conserved elements (0%). Previously annotated lincRNAs show 7.3% relative constraint, lincRNAs with conserved expression in mammals (mammalian-conserved) show 12.6% relative constraint, and hominid-specific lincRNAs show -3.2% relative constraint, as they are more diverged than the neutral reference defined as non-ENCODE regions in non-conserved, non-coding regions.

## Supplementary Figure 1

Example of a locus annotated as lincRNAs by GENCODE that shows strong conservation of transcription across species and strong protein-coding potential. The transcription and many splice sites are conserved across all placental mammals and also in opossum and platypus. RNAcode detects 4 independent high scoring segments with p-values between 10-4 and 10-6.

The actual sequence alignment of the first high scoring segment is shown. It is characterized by many synonymous and conservative mutations preserving the protein. This analysis also includes data from opossum and platypus from (Merkin et al. 2012).

## Supplementary Figure 2

Statistics of mapping of lincRNA loci between species. The left column shows the distribution of the fraction of bases that could be aligned from human to the other species. Only bases within exons (union over all isoforms) were considered. The second column shows the distribution of a metric that measures if a locus only maps to one syntenic region in the genome or to several non-syntenic regions in the genome (Methods). The third column shows the fraction of lincRNA loci that could be mapped reciprocally (Methods). This statistic is shown for all lincRNAs and also for only those lincRNAs that were found to be expressed significantly (p<0.1) in the other species.

## Supplementary Figure 3

Fraction of nucleotides aligned to the various species for lincRNAs, mRNAs and random controls.

## Supplementary Figure 4

Cumulative distributions of normalized read counts across species. The data shown is the same as in Fig. 2A with the exception that we only considered lincRNAs that could be reliably aligned (>30% of exonic regions covered and reciprocal) to the other species.

## Supplementary Figure 5

Reproducibility of expression levels between individuals. The average read density (summed over all tissues ) of exonic positions (i.e. positions that are within an exon in the human transcript and that could be aligned to another species) is compared between two individuals of each species. The Pearson correlation coefficient (r2) is shown. See also Supplementary Figure 6 that shows reproducibility of derived expression p-values that were actually used for most analysis in this paper.

## Supplementary Figure 6

Reproducibility of expression p-values between individuals. (**A)** Expression p-values have been calculated independently for two individuals of each species. The distribution of differences of p-values is shown. The majority of p-values can be reproduced with +/-0.05 between species. (**B**) Estimating loss of sensitivity by natural variation for a p-value cutoff of 0.05. LincRNAs that have p-values <0.05 in individual A were selected and the distribution of corresponding p-values in individual B is shown. The fraction that does not meet the cutoff in individual B is indicated. Note that *all* variation leads to loss in sensitivity because any variation that leads to higher expression levels in individual B does not improve sensitivity.

## Supplementary Figure 7

(A) Conservation of tissue specificity for protein-coding genes. The same results as in Fig. 3 are shown for a set of 300 randomly chosen mRNAs. (B) Correlation of expression between species across all tissues for lincRNAs. The results for the full set are shown in Fig 3C. Here, subsets for lincRNAs depending on their distance and orientation relative to the closest protein coding gene are shown.

## Supplementary Figure 8

Prediction of orthologous exons using Cufflinks. The fraction of exons in human lincRNAs that have overlap with predicted Cufflinks exons in other species are shown. Also the fraction of exons that have no overlapping Cufflink exon but could be aligned to the other species is shown.

## Supplementary Figure 9

Additional comparison between hominid-specific and mammalian conserved lincRNAs. This figure extends Fig. 5 with additional characteristics. (**A**) Annotation status as provided by GENCODE. (**B**) Annotation biotype as provided by GENCODE. (**C**) Relative orientation of lincRNAs compared to their immediate upstream and downstream neighboring protein-coding genes. (**D**) Number of different splicing isoforms for lincRNA loci as annotated by GENCODE (**E**) Number of exons (transcript with the most exons for each locus was considered) (**F**) GC content and length.
